# Supplementary material for: Genetic differentiation and genetic structure of mixed-ploidy Camellia hainanica populations
Source: PeerJ. 2023 Feb 22;11:e14756. doi: 10.7717/peerj.14756 (PMC9961093; doi:10.7717/peerj.14756)
Supplement: Supplemental Information 1 [file peerj-11-14756-s001.xlsx]

## Sheet: Sheet1
Allelic configuration of each sample at 12 SSR loci
Sample	Marker	Allele.1	Allele.2	Allele.3	Allele.4	Allele.5	Allele.6	Allele.7
A1	loc1	186	201
A2	loc1	186
A3	loc1	198	201
A4	loc1	186	201
A5	loc1	180	201
A6	loc1	198
A7	loc1	180	198
A8	loc1	180
A9	loc1	189
A10	loc1	186	201
A11	loc1	180	186
A12	loc1	180	198
A13	loc1	189	201
A14	loc1	201
A15	loc1	195
A16	loc1	180
A17	loc1	186
B1	loc1	189
B2	loc1	198
B3	loc1	198
B4	loc1	180	198
B5	loc1	186	195	201
B6	loc1	186
B7	loc1	180
B8	loc1	189
B9	loc1	186
B10	loc1	192
C1	loc1	201
C2	loc1	198
C3	loc1	198
C4	loc1	186
C5	loc1	201
C6	loc1	186	189	195
C7	loc1	186	189
C8	loc1	192
C9	loc1	198	201
C10	loc1	198
C11	loc1	198
C12	loc1	180
C13	loc1	195
C14	loc1	192	198
C15	loc1	180
C16	loc1	186	198
C17	loc1	201
C18	loc1	201
D1	loc1	198
D2	loc1	186	189	192
D3	loc1	192
D4	loc1	186	189	192	201
D5	loc1	192
D6	loc1	189	192
D7	loc1	186	192	198
D8	loc1	189	192
D9	loc1	192	198
D10	loc1	186	189
D11	loc1	201
D12	loc1	186	189
D13	loc1	186	189	192	195
D14	loc1	186	198	201
D15	loc1	186	189	192
D16	loc1	201
D17	loc1	186	198
D18	loc1	186	189	192	195
D19	loc1	180	189	195	201
D20	loc1	186	189	192	195
E1	loc1	180	186	189
E2	loc1	186	189	192	195
E3	loc1	198
E4	loc1	180	186	192
E5	loc1	186	189	192	198
E6	loc1	186	189	192	195	198	201
E7	loc1	186	189	192
E8	loc1	180	186	189	192	195
E9	loc1	186	192
F1	loc1	186	189	192
F2	loc1	186	189	192	195
F3	loc1	186
F4	loc1	186	192	195
F5	loc1	192	195
F6	loc1	186	189
F7	loc1	186
F8	loc1	189	192	198
F9	loc1	186	192
F10	loc1	186	189	201
F11	loc1	186	189	192	195
F12	loc1	186	201
F13	loc1	186
F14	loc1	180	186
F15	loc1	186	192	195
F16	loc1	186	189
F17	loc1	186	189	192
F18	loc1	189	192
F19	loc1	186	189	192
F20	loc1	186	189	192	195
F21	loc1	186	189	192
F22	loc1	186
A1	loc2	152	216
A2	loc2	152	216
A3	loc2	202
A4	loc2	248
A5	loc2	-9
A6	loc2	242	248
A7	loc2	216
A8	loc2	180
A9	loc2	152	216
A10	loc2	152
A11	loc2	152	216
A12	loc2	276
A13	loc2	152	202	276
A14	loc2	184
A15	loc2	-9
A16	loc2	180
A17	loc2	152
B1	loc2	180	190
B2	loc2	160	242
B3	loc2	156	180	220	242
B4	loc2	152
B5	loc2	-9
B6	loc2	152	242
B7	loc2	180	216	276
B8	loc2	156
B9	loc2	160	190
B10	loc2	190	216	220	242
C1	loc2	156	180	220
C2	loc2	180	196	202
C3	loc2	156	220
C4	loc2	260
C5	loc2	202
C6	loc2	184
C7	loc2	248	260	276
C8	loc2	248	292
C9	loc2	292
C10	loc2	292
C11	loc2	292
C12	loc2	160	220	260
C13	loc2	216	220	260
C14	loc2	180	260
C15	loc2	202	292
C16	loc2	184	190	202
C17	loc2	202	292
C18	loc2	202	292
D1	loc2	292
D2	loc2	180
D3	loc2	260
D4	loc2	220	292
D5	loc2	292
D6	loc2	292
D7	loc2	180	260	292
D8	loc2	180
D9	loc2	-9
D10	loc2	260
D11	loc2	196
D12	loc2	292
D13	loc2	184	216
D14	loc2	292
D15	loc2	180	196
D16	loc2	292
D17	loc2	260
D18	loc2	216	260	276
D19	loc2	152	160	180	248	276	292
D20	loc2	196
E1	loc2	180	216	220	242	260	276
E2	loc2	202
E3	loc2	184	190	202	292
E4	loc2	180	260	276
E5	loc2	152	180	220	260
E6	loc2	180	216	276
E7	loc2	180	216
E8	loc2	196
E9	loc2	196	202	292
F1	loc2	260
F2	loc2	152	156	230	242
F3	loc2	152	180	292
F4	loc2	242
F5	loc2	220
F6	loc2	180	220	260
F7	loc2	-9
F8	loc2	248	292
F9	loc2	248	292
F10	loc2	202	292
F11	loc2	276
F12	loc2	-9
F13	loc2	152	190	260
F14	loc2	152	180	196	220	292
F15	loc2	152	216	248
F16	loc2	-9
F17	loc2	248
F18	loc2	202
F19	loc2	242
F20	loc2	184	248	260
F21	loc2	152	184	260	276
F22	loc2	190	196	202	292
A1	loc3	278	299	305
A2	loc3	278	299
A3	loc3	278	287	299	305
A4	loc3	278	287	305
A5	loc3	278	287	299
A6	loc3	278	287	299	305
A7	loc3	200	278	299	305
A8	loc3	278	299
A9	loc3	200	278	287
A10	loc3	278
A11	loc3	278
A12	loc3	278
A13	loc3	278	287	299
A14	loc3	278	287	299
A15	loc3	278	299
A16	loc3	278	287	299
A17	loc3	278	293
B1	loc3	278	287	293	305
B2	loc3	278
B3	loc3	278
B4	loc3	278
B5	loc3	278	299
B6	loc3	278
B7	loc3	278	287	299
B8	loc3	278	299
B9	loc3	278	299
B10	loc3	278	287	299
C1	loc3	278	287	299
C2	loc3	278
C3	loc3	278	299
C4	loc3	278	287	299
C5	loc3	278	287	299
C6	loc3	278	287
C7	loc3	278	287	305
C8	loc3	278
C9	loc3	278
C10	loc3	278	287	299
C11	loc3	278
C12	loc3	278	299
C13	loc3	200	278	287	299
C14	loc3	278	299
C15	loc3	278	299
C16	loc3	278
C17	loc3	278
C18	loc3	278	287	299
D1	loc3	278
D2	loc3	200	293
D3	loc3	278	287	299
D4	loc3	293
D5	loc3	278	287	293	299
D6	loc3	278
D7	loc3	200	278
D8	loc3	278
D9	loc3	278
D10	loc3	200	278	293
D11	loc3	287
D12	loc3	200	293
D13	loc3	200
D14	loc3	287
D15	loc3	200	293
D16	loc3	278
D17	loc3	278
D18	loc3	200	278	293
D19	loc3	200
D20	loc3	200	278
E1	loc3	278	299
E2	loc3	278
E3	loc3	200	293
E4	loc3	200	278
E5	loc3	278	287	299
E6	loc3	278	293
E7	loc3	278
E8	loc3	200	293
E9	loc3	200	278	293
F1	loc3	278	287	299
F2	loc3	200	278	293	299
F3	loc3	200	278	287
F4	loc3	200	278	287	293	299
F5	loc3	200	293
F6	loc3	278
F7	loc3	278
F8	loc3	200	278	287
F9	loc3	278	287	299
F10	loc3	200	293
F11	loc3	200	278	293
F12	loc3	200	293
F13	loc3	200	293
F14	loc3	278	287	299
F15	loc3	278
F16	loc3	278
F17	loc3	278
F18	loc3	200
F19	loc3	293
F20	loc3	200	278	287	293
F21	loc3	278	287	299
F22	loc3	287
A1	loc4	261	267	294	310
A2	loc4	261	267	294	310
A3	loc4	261	267	294	310
A4	loc4	261	267	294	310
A5	loc4	261	267	294	310
A6	loc4	261	267	294	310
A7	loc4	261	267	294	310
A8	loc4	261	267	294	310
A9	loc4	261	267	294	310
A10	loc4	261	267
A11	loc4	294
A12	loc4	267
A13	loc4	261	267	294	310
A14	loc4	261	267	294	310
A15	loc4	261	267	294	310
A16	loc4	261	267	294	310
A17	loc4	261	267	294	310
B1	loc4	261	267	294	310
B2	loc4	261
B3	loc4	267
B4	loc4	261	267	294	310
B5	loc4	261	267	294	310
B6	loc4	261	267	294	310
B7	loc4	261	267	294	310
B8	loc4	261
B9	loc4	261	267	294	310
B10	loc4	261	267	294	310
C1	loc4	261	267	294	310
C2	loc4	261
C3	loc4	243	261	267	294	310
C4	loc4	261	267	294	310
C5	loc4	261	267	294	310
C6	loc4	261
C7	loc4	261	267	294	310
C8	loc4	261
C9	loc4	261
C10	loc4	261	294
C11	loc4	261
C12	loc4	243	261	267	294	310
C13	loc4	261	267	294	310
C14	loc4	261	267
C15	loc4	243	261	267	294	310
C16	loc4	261
C17	loc4	267
C18	loc4	261	267	294	310
D1	loc4	261	267	310
D2	loc4	261	267	294	310
D3	loc4	243	261	273
D4	loc4	243	261	267	270	276
D5	loc4	261	267	276
D6	loc4	294
D7	loc4	243	261	267	270	294
D8	loc4	243	261	264	267	270
D9	loc4	261	294
D10	loc4	261	261	267
D11	loc4	243	261	267
D12	loc4	267
D13	loc4	261
D14	loc4	294
D15	loc4	243	243	261	264	270
D16	loc4	261	267	294	310
D17	loc4	243
D18	loc4	243	261	264	276	294
D19	loc4	243
D20	loc4	261	270
E1	loc4	246	264	270
E2	loc4	243
E3	loc4	246
E4	loc4	246	261
E5	loc4	246	264
E6	loc4	246	270
E7	loc4	246
E8	loc4	261
E9	loc4	267	276
F1	loc4	261	264	294	310
F2	loc4	246	261	276
F3	loc4	261	267
F4	loc4	246	261
F5	loc4	261	270	276	294
F6	loc4	261	264	267	270	294
F7	loc4	261	267	294
F8	loc4	261	270
F9	loc4	246	261	276
F10	loc4	246
F11	loc4	261
F12	loc4	261	267	294	310
F13	loc4	246	261	270
F14	loc4	243	261	273
F15	loc4	261
F16	loc4	243
F17	loc4	261
F18	loc4	246	270
F19	loc4	243	261	267	294
F20	loc4	243	261	264	294	310
F21	loc4	243	261	264	270
F22	loc4	243	261	267	270	294
A1	loc5	202
A2	loc5	202
A3	loc5	202
A4	loc5	202
A5	loc5	202
A6	loc5	202
A7	loc5	202
A8	loc5	202
A9	loc5	294
A10	loc5	202
A11	loc5	202
A12	loc5	202
A13	loc5	202
A14	loc5	202
A15	loc5	262
A16	loc5	202
A17	loc5	262
B1	loc5	262
B2	loc5	262
B3	loc5	262
B4	loc5	262
B5	loc5	262
B6	loc5	262
B7	loc5	262
B8	loc5	262
B9	loc5	202	262
B10	loc5	202
C1	loc5	262
C2	loc5	202
C3	loc5	262
C4	loc5	202
C5	loc5	202
C6	loc5	202	262
C7	loc5	202	262
C8	loc5	262
C9	loc5	202
C10	loc5	202
C11	loc5	202
C12	loc5	262
C13	loc5	202
C14	loc5	170	202	262
C15	loc5	202
C16	loc5	170	262
C17	loc5	202
C18	loc5	202
D1	loc5	202
D2	loc5	202	262
D3	loc5	262
D4	loc5	202	262	294
D5	loc5	202	294
D6	loc5	202	262	294
D7	loc5	170	262	294
D8	loc5	202	262	294
D9	loc5	170	262	294
D10	loc5	170	202	222	262	294
D11	loc5	170	202	262	294
D12	loc5	170	202	262	294
D13	loc5	170	202	262	294
D14	loc5	170	202	262
D15	loc5	170	202	262	294
D16	loc5	170	202	262	294
D17	loc5	202	262	294
D18	loc5	170	202	222	262	294
D19	loc5	202	262	294
D20	loc5	170	202	262	294
E1	loc5	170	202	262		294
E2	loc5	170	202	262	294
E3	loc5	170	202	262
E4	loc5	170	202	222	262
E5	loc5	170	202	262	294
E6	loc5	170	202	222	262
E7	loc5	170	202	262	294
E8	loc5	170	202	262
E9	loc5	170	202	262
F1	loc5	170	202	262
F2	loc5	170	262
F3	loc5	170	202	262	294
F4	loc5	170	202	262
F5	loc5	170	202	222	262	294
F6	loc5	170	202	262	294
F7	loc5	262	294
F8	loc5	170	202	262	294
F9	loc5	170	202	262
F10	loc5	170	202	222	262
F11	loc5	170	202	262	294
F12	loc5	170	202	222	262	294
F13	loc5	170	262	294
F14	loc5	170	202	294
F15	loc5	170	262
F16	loc5	202	294
F17	loc5	202
F18	loc5	170	202	262	294
F19	loc5	170	202	262
F20	loc5	170	202	262
F21	loc5	170	202	262	294
F22	loc5	170	202	262	294
A1	loc6	260	263
A2	loc6	263	269
A3	loc6	263	269
A4	loc6	263
A5	loc6	263
A6	loc6	245	263	269
A7	loc6	263
A8	loc6	263
A9	loc6	263
A10	loc6	263
A11	loc6	263
A12	loc6	263
A13	loc6	263	266	269
A14	loc6	263	266	269
A15	loc6	263
A16	loc6	263
A17	loc6	263
B1	loc6	263
B2	loc6	263
B3	loc6	263
B4	loc6	263
B5	loc6	263
B6	loc6	245	260	263
B7	loc6	245	263
B8	loc6	263
B9	loc6	263
B10	loc6	263
C1	loc6	263
C2	loc6	263
C3	loc6	263
C4	loc6	263
C5	loc6	260	263
C6	loc6	245	263
C7	loc6	263	269
C8	loc6	263
C9	loc6	266
C10	loc6	263	266
C11	loc6	263
C12	loc6	263
C13	loc6	263	266
C14	loc6	263
C15	loc6	263
C16	loc6	266
C17	loc6	263
C18	loc6	245	263	269
D1	loc6	263
D2	loc6	263
D3	loc6	263
D4	loc6	263
D5	loc6	263	266
D6	loc6	263	266
D7	loc6	245	263
D8	loc6	263
D9	loc6	260	263
D10	loc6	245	263
D11	loc6	263
D12	loc6	263
D13	loc6	245	263
D14	loc6	263	266
D15	loc6	263
D16	loc6	263
D17	loc6	263
D18	loc6	260	263	269
D19	loc6	263
D20	loc6	245	263
E1	loc6	245	263
E2	loc6	263
E3	loc6	263
E4	loc6	263	266
E5	loc6	263
E6	loc6	263
E7	loc6	263
E8	loc6	263
E9	loc6	263
F1	loc6	263
F2	loc6	260	263	266	269
F3	loc6	245	263	266
F4	loc6	263
F5	loc6	260	263	266
F6	loc6	263	266	269
F7	loc6	266
F8	loc6	263
F9	loc6	263
F10	loc6	263
F11	loc6	260	263
F12	loc6	263
F13	loc6	260	263	266
F14	loc6	263	269
F15	loc6	245	263
F16	loc6	263	266
F17	loc6	263
F18	loc6	263	269
F19	loc6	263
F20	loc6	245	263
F21	loc6	260	263	269
F22	loc6	260	263	266
A1	loc7	197
A2	loc7	197
A3	loc7	195
A4	loc7	193
A5	loc7	215
A6	loc7	187	195
A7	loc7	195	199
A8	loc7	197
A9	loc7	195
A10	loc7	195
A11	loc7	197
A12	loc7	197
A13	loc7	201
A14	loc7	197	201
A15	loc7	195	197
A16	loc7	197
A17	loc7	195
B1	loc7	197
B2	loc7	197
B3	loc7	197
B4	loc7	197
B5	loc7	193	197
B6	loc7	195	197
B7	loc7	191	199
B8	loc7	197
B9	loc7	195	197	205
B10	loc7	191	195	197
C1	loc7	187	193	195	197	201
C2	loc7	197
C3	loc7	193	195	197	201	205
C4	loc7	187	191	199
C5	loc7	193	199
C6	loc7	195
C7	loc7	195
C8	loc7	199
C9	loc7	193
C10	loc7	195
C11	loc7	195
C12	loc7	195	199	201	205
C13	loc7	195	201
C14	loc7	195	197
C15	loc7	191	195	197
C16	loc7	193
C17	loc7	191
C18	loc7	195
D1	loc7	195
D2	loc7	195	197
D3	loc7	193
D4	loc7	197
D5	loc7	195	197	201
D6	loc7	195
D7	loc7	191	195	197
D8	loc7	191	195	197
D9	loc7	197
D10	loc7	187	191	195	197
D11	loc7	201
D12	loc7	201
D13	loc7	197
D14	loc7	197
D15	loc7	195	197	201
D16	loc7	201
D17	loc7	201
D18	loc7	195	197
D19	loc7	197	201
D20	loc7	197
E1	loc7	191	195	197
E2	loc7	195
E3	loc7	195	197
E4	loc7	191	195	197
E5	loc7	195	197
E6	loc7	195	197	205
E7	loc7	195	199
E8	loc7	195	197	201
E9	loc7	197	201
F1	loc7	195	197	201
F2	loc7	195	197	201
F3	loc7	195	197
F4	loc7	191	195	197
F5	loc7	191	195
F6	loc7	187	191	195	197	201	205	215
F7	loc7	193	195	197	215
F8	loc7	195	199	201
F9	loc7	187	193	195	197
F10	loc7	201
F11	loc7	197
F12	loc7	197
F13	loc7	195	197	215
F14	loc7	199
F15	loc7	197
F16	loc7	197
F17	loc7	197	215
F18	loc7	195	197
F19	loc7	195	197
F20	loc7	195	197
F21	loc7	191	195	197	205
F22	loc7	191	195	197
A1	loc8	174	178	204
A2	loc8	170
A3	loc8	170	178	180	204
A4	loc8	164
A5	loc8	156	162	178	180	182	204
A6	loc8	178	204
A7	loc8	170	204
A8	loc8	170	204
A9	loc8	170	204
A10	loc8	168
A11	loc8	170
A12	loc8	168
A13	loc8	164	168	174	182	182	186	204
A14	loc8	156	168	174	178	182	204
A15	loc8	170	204
A16	loc8	168	174	204
A17	loc8	182	204
B1	loc8	164	204
B2	loc8	168
B3	loc8	168
B4	loc8	164
B5	loc8	162	204
B6	loc8	170	174	204
B7	loc8	156	178	182	204
B8	loc8	170	204
B9	loc8	174	178	180			204
B10	loc8	168	174	178
C1	loc8	170	174	204
C2	loc8	168
C3	loc8	168	170	178
C4	loc8	156	174	180	186	204
C5	loc8	168	170	174	178	180	204
C6	loc8	164	174	178	180	186	204
C7	loc8	170	178
C8	loc8	168
C9	loc8	168
C10	loc8	178
C11	loc8	170
C12	loc8	170	174
C13	loc8	164	174	182
C14	loc8	170	186
C15	loc8	174	180	182	186	204
C16	loc8	170
C17	loc8	-9
C18	loc8	168	174	204
D1	loc8	156	170	178
D2	loc8	168	180
D3	loc8	162	170	178
D4	loc8	170	182
D5	loc8	162
D6	loc8	-9
D7	loc8	168	170	180	204
D8	loc8	186
D9	loc8	168
D10	loc8	164
D11	loc8	168	182	204
D12	loc8	156	170	204
D13	loc8	164	178
D14	loc8	-9
D15	loc8	204
D16	loc8	170	178	204
D17	loc8	-9
D18	loc8	204
D19	loc8	156	164	168	170	178
D20	loc8	164	178
E1	loc8	164	174
E2	loc8	168
E3	loc8	156	168	170	178	204
E4	loc8	170	178
E5	loc8	170
E6	loc8	164	170
E7	loc8	170
E8	loc8	168	178	186	204
E9	loc8	204
F1	loc8	162	204
F2	loc8	204
F3	loc8	156	178	180	186	204
F4	loc8	168	170	204
F5	loc8	174	178	204
F6	loc8	174	178	182	186
F7	loc8	162	170	204
F8	loc8	174	178	180	186
F9	loc8	178	182
F10	loc8	168	178	204
F11	loc8	168	174	178	204
F12	loc8	204
F13	loc8	168	174	178	182	186	204
F14	loc8	168	174	178	182	186	204
F15	loc8	168	170	178
F16	loc8	-9
F17	loc8	164	178
F18	loc8	156	162	168	174	178	180	204
F19	loc8	170	178
F20	loc8	168	170	180	204
F21	loc8	168	204
F22	loc8	168	174	178	182	186
A1	loc9	200	230	260
A2	loc9	230	234
A3	loc9	230	234
A4	loc9	230	234
A5	loc9	230	260
A6	loc9	230	260
A7	loc9	200
A8	loc9	230	234
A9	loc9	200	260
A10	loc9	230
A11	loc9	230
A12	loc9	234
A13	loc9	200	230	236	260
A14	loc9	230
A15	loc9	230
A16	loc9	230	236
A17	loc9	200	230	260
B1	loc9	230
B2	loc9	230
B3	loc9	230
B4	loc9	230
B5	loc9	230
B6	loc9	230	260
B7	loc9	230	234
B8	loc9	230	234
B9	loc9	230
B10	loc9	234
C1	loc9	200	230	234	236
C2	loc9	230
C3	loc9	230	234
C4	loc9	230
C5	loc9	230
C6	loc9	230	234	236
C7	loc9	200	230
C8	loc9	230
C9	loc9	230
C10	loc9	230	234
C11	loc9	230
C12	loc9	230	234
C13	loc9	200	230	236	260
C14	loc9	230
C15	loc9	230
C16	loc9	230
C17	loc9	234
C18	loc9	200	230
D1	loc9	230
D2	loc9	230	234
D3	loc9	230
D4	loc9	230
D5	loc9	230
D6	loc9	200
D7	loc9	170	230	234
D8	loc9	230
D9	loc9	200
D10	loc9	170	230	234
D11	loc9	170	200	260
D12	loc9	230
D13	loc9	230
D14	loc9	200
D15	loc9	200	230
D16	loc9	170	200	260
D17	loc9	200	230
D18	loc9	170	200	230	234
D19	loc9	170	200	230	234
D20	loc9	200	260
E1	loc9	230
E2	loc9	170	200	260
E3	loc9	170	200	260
E4	loc9	230
E5	loc9	200	230	234	236
E6	loc9	170	230	234
E7	loc9	230	234
E8	loc9	200
E9	loc9	200
F1	loc9	230	234	236
F2	loc9	230	234	236
F3	loc9	230	234	236
F4	loc9	170	200	230	234	260
F5	loc9	170	230
F6	loc9	230	234
F7	loc9	230
F8	loc9	200	230
F9	loc9	230
F10	loc9	170
F11	loc9	170	200	230	234
F12	loc9	170	200	260
F13	loc9	170	200
F14	loc9	230	234
F15	loc9	230
F16	loc9	200
F17	loc9	200	260
F18	loc9	170	230	234	236
F19	loc9	230	234	236
F20	loc9	230	234
F21	loc9	230
F22	loc9	230	234	236
A1	loc10	-9
A2	loc10	189	291
A3	loc10	291
A4	loc10	174		189	195	291
A5	loc10	198	249
A6	loc10	174
A7	loc10	-9
A8	loc10	258
A9	loc10	189	258	291	309
A10	loc10	189	195	201	201
A11	loc10	-9
A12	loc10	-9
A13	loc10	189	198	201	201
A14	loc10	189	198	228
A15	loc10	174
A16	loc10	291
A17	loc10	183	201	291
B1	loc10	174	189	228	291
B2	loc10	174	291
B3	loc10	189	195	201	228	291
B4	loc10	183	189	195	198
B5	loc10	183	189	195	201	291
B6	loc10	201
B7	loc10	195
B8	loc10	174	201	291
B9	loc10	291
B10	loc10	189
C1	loc10	-9
C2	loc10	198
C3	loc10	189
C4	loc10	195	291
C5	loc10	198
C6	loc10	195	198	291
C7	loc10	189	198	291
C8	loc10	189
C9	loc10	174
C10	loc10	-9
C11	loc10	174
C12	loc10	174
C13	loc10	249
C14	loc10	201	291
C15	loc10	183	189	195	291
C16	loc10	189
C17	loc10	189	195	198
C18	loc10	291
D1	loc10	198
D2	loc10	228
D3	loc10	228
D4	loc10	201	258	291	309
D5	loc10	201	258	291	309
D6	loc10	201	258	291	309
D7	loc10	183	201	258	291	309
D8	loc10	201	261	291	309
D9	loc10	201	258	291	309
D10	loc10	201	258	291	309
D11	loc10	183	201	309
D12	loc10	201	258	291	309
D13	loc10	201	258	291	309
D14	loc10	201	258	291
D15	loc10	183	201	258	291	309
D16	loc10	201	258	291	309
D17	loc10	183	201	258	291	309
D18	loc10	201	258	291	309
D19	loc10	183	201	258	291	309
D20	loc10	201	258	291	309
E1	loc10	189	201	261	291	309
E2	loc10	201	258	291	309
E3	loc10	201	258	291	309
E4	loc10	201	258	291	309
E5	loc10	201	258	291	309
E6	loc10	201	258	291	309
E7	loc10	183	201	261	291
E8	loc10	201	261	291	309
E9	loc10	201	258	291	309
F1	loc10	201	261	291	309
F2	loc10	201	258	291	309
F3	loc10	201	258	291	309
F4	loc10	201	258	291	309
F5	loc10	201	258	291	309
F6	loc10	201
F7	loc10	201	261	291	309
F8	loc10	201	261	291
F9	loc10	201	261	309
F10	loc10	201
F11	loc10	183	201	261	291	309
F12	loc10	201
F13	loc10	183	201	261	291	309
F14	loc10	201	291
F15	loc10	201	261	291	309
F16	loc10	201	261	291	309
F17	loc10	201	261	291	309
F18	loc10	201	261	291	309
F19	loc10	201	261	291	309
F20	loc10	183	201	261	291	309
F21	loc10	189	201	261	291	309
F22	loc10	189	201	261	291	309
A1	loc11	203	293
A2	loc11	203	293
A3	loc11	203	245	260	293
A4	loc11	203	245
A5	loc11	203
A6	loc11	203	224	245
A7	loc11	203	245
A8	loc11	203	245	260	293
A9	loc11	203	260	293
A10	loc11	203
A11	loc11	203
A12	loc11	203
A13	loc11	203	245
A14	loc11	209
A15	loc11	203	245	260	266
A16	loc11	203	245
A17	loc11	203	224	260	293
B1	loc11	203	209	245	272
B2	loc11	203
B3	loc11	203
B4	loc11	203
B5	loc11	245
B6	loc11	203	224	245	260	293
B7	loc11	224	245
B8	loc11	245
B9	loc11	203	245	260
B10	loc11	245
C1	loc11	203	245	260	272
C2	loc11	203
C3	loc11	203	245	260
C4	loc11	203	224	245	260
C5	loc11	203	245
C6	loc11	203	224	266	293
C7	loc11	203	245
C8	loc11	203
C9	loc11	203
C10	loc11	203
C11	loc11	203
C12	loc11	203	245	260
C13	loc11	203	245	260	293
C14	loc11	272
C15	loc11	203	245	272	293
C16	loc11	203
C17	loc11	203
C18	loc11	203	245
D1	loc11	245
D2	loc11	203	245	260
D3	loc11	224	245	272
D4	loc11	245	260
D5	loc11	245
D6	loc11	203	260	293
D7	loc11	203	245	260
D8	loc11	245	260	272
D9	loc11	203
D10	loc11	224	245	260	272
D11	loc11	224	260
D12	loc11	245	260
D13	loc11	245	260
D14	loc11	203
D15	loc11	245	260	272
D16	loc11	209	260	293
D17	loc11	245	260
D18	loc11	224	245	260	272
D19	loc11	224	260
D20	loc11	245	260
E1	loc11	245	260
E2	loc11	260
E3	loc11	203	245	260	293
E4	loc11	203	224	245	260	272
E5	loc11	203	245	260	293
E6	loc11	224	245	260	272
E7	loc11	245
E8	loc11	260
E9	loc11	209	224	245	260	272
F1	loc11	245
F2	loc11	224	245	260	293
F3	loc11	203	224	245	260	266	272
F4	loc11	245	260
F5	loc11	209	245	260	266	293
F6	loc11	224	245	260	266
F7	loc11	260
F8	loc11	224	245	266	272
F9	loc11	224	245
F10	loc11	203	245	260	272
F11	loc11	245
F12	loc11	203	260
F13	loc11	245	260	293
F14	loc11	224	245	272
F15	loc11	245	260
F16	loc11	260
F17	loc11	245	260
F18	loc11	245
F19	loc11	224	245
F20	loc11	245	260	272
F21	loc11	245
F22	loc11	209	245
A1	loc12	204	294
A2	loc12	204
A3	loc12	204	294
A4	loc12	204	262	294
A5	loc12	204	294	350
A6	loc12	204	262	294
A7	loc12	204	262	294
A8	loc12	204	262	350
A9	loc12	204	262	350
A10	loc12	262
A11	loc12	204
A12	loc12	204
A13	loc12	204	294	350
A14	loc12	204	294
A15	loc12	262	294
A16	loc12	204	262	294
A17	loc12	204	262	294
B1	loc12	204	262	294	350
B2	loc12	204
B3	loc12	294
B4	loc12	294	350
B5	loc12	262	294	350
B6	loc12	204	294
B7	loc12	204	294	350
B8	loc12	262	294
B9	loc12	294	350
B10	loc12	204	262	294	350
C1	loc12	262	294
C2	loc12	262	294
C3	loc12	294	350
C4	loc12	204	262	294	350
C5	loc12	204	262	294
C6	loc12	204	262	294
C7	loc12	204	350
C8	loc12	204
C9	loc12	204
C10	loc12	204	262	294
C11	loc12	204
C12	loc12	204	294	350
C13	loc12	204	262	294	350
C14	loc12	204	294
C15	loc12	204	294	350
C16	loc12	204
C17	loc12	294
C18	loc12	204	262	294	350
D1	loc12	204	262	294
D2	loc12	204	262	294
D3	loc12	204	262	294
D4	loc12	204	262	294
D5	loc12	204	262	294	350
D6	loc12	204
D7	loc12	204	262	294
D8	loc12	262
D9	loc12	262
D10	loc12	204
D11	loc12	294
D12	loc12	262	294
D13	loc12	262
D14	loc12	262
D15	loc12	262	294
D16	loc12	262
D17	loc12	262
D18	loc12	262	294
D19	loc12	204	262	294	350
D20	loc12	294
E1	loc12	262
E2	loc12	262
E3	loc12	204	262	294
E4	loc12	262	350
E5	loc12	204	350
E6	loc12	262	294	350
E7	loc12	262	294	350
E8	loc12	262
E9	loc12	204	262	350
F1	loc12	262	294
F2	loc12	262	294
F3	loc12	350
F4	loc12	262
F5	loc12	204	294
F6	loc12	350
F7	loc12	350
F8	loc12	262	294	350
F9	loc12	262
F10	loc12	262
F11	loc12	294
F12	loc12	204	262	294
F13	loc12	262
F14	loc12	262	294	350
F15	loc12	294
F16	loc12	262
F17	loc12	262
F18	loc12	204	294
F19	loc12	294
F20	loc12	204	262	294
F21	loc12	262	350
F22	loc12	294	350
A：Tunchang; B：Wuzhishan; C：Qionghai; D：Qiongzhong; E：Chengmai; F:Dingan
